# Supplementary material
Source: PubMed Central journal article supplement (PMC5864228)

## SUPPLEMENTARY INFORMATION

Supplementary materials include a table listing *Geopemphigus* samples used in this study, a table listing characteristics of genomes compared, and a figure of phylogenies for aphid-host genes.

**Table S1.** List of *Geopemphigus* samples used for phylogenetic analysis and genome assembly and annotation.

| <b>ID</b>  | <b>Sample</b>                 | <b>Location</b>              | <b>Approximate Coordinates</b> | <b>Collection Date</b> | <b>Collector</b>          |
|------------|-------------------------------|------------------------------|--------------------------------|------------------------|---------------------------|
| UNAM 2116  | <i>Geopemphigus blackmani</i> | Mezquititlán Hidalgo, Mexico | 20.53, -98.63                  | 9 July 2015            | A. L. Muñoz               |
| UNAM 2053  | <i>Geopemphigus sp. E</i>     | Mezquititlán Hidalgo, Mexico | 20.53, -98.63                  | 9 July 2015            | A. L. Muñoz               |
| This study | <i>Geopemphigus sp. S2</i>    | Langtry, Texas, USA          | 29.81, -101.56                 | 24 July 2016           | R.A. Chong<br>N. A. Moran |
| This study | <i>Geopemphigus sp. C7</i>    | Langtry, Texas, USA          | 29.81, -101.56                 | 24 July 2016           | R.A. Chong<br>N. A. Moran |

**Table S2.** Genome characteristics of free-living, facultative, and insect endosymbiont bacterial genomes.

| GenBank           | Species                                                           | Phylum         | MB   | GC % | CDS  | rRNA | tRNA | Other RNA | Pseudo gene | Status      |
|-------------------|-------------------------------------------------------------------|----------------|------|------|------|------|------|-----------|-------------|-------------|
| NC006347          | <i>Bacteroides fragilis</i> _YCH46                                | Bacteroidetes  | 5.28 | 43.3 | 4578 | 18   | 74   | 0         | 0           | Free living |
| CP012706.1        | <i>Bacteroides fragilis</i> _S14                                  | Bacteroidetes  | 4.90 | 43.2 | 3813 | 18   | 73   | 1         | 46          | Free living |
| NC009614          | <i>Bacteroides vulgatus</i> _ATCC 8482                            | Bacteroidetes  | 5.16 | 42.2 | 4077 | 22   | 83   | 2         | 146         | Free living |
| NC000913          | <i>Escherichia coli</i> _K12_MG1655                               | Proteobacteria | 4.64 | 50.8 | 4140 | 22   | 89   | 67        | 184         | Free living |
| NC003197          | <i>Salmonella enterica</i> _st_LT2                                | Proteobacteria | 4.86 | 52.2 | 4453 | 22   | 85   | 10        | 39          | Free living |
| NC013454.1        | <i>Blattabacterium</i> _sp_BGE                                    | Bacteroidetes  | 0.64 | 27.1 | 557  | 3    | 34   | 2         | 19          | Obligate    |
| NC013418          | <i>Blattabacterium</i> _sp_BPLAN                                  | Bacteroidetes  | 0.64 | 28.0 | 580  | 3    | 33   | 2         | 12          | Obligate    |
| CP001981.1        | <i>Sulcia muelleri</i> _CA RI                                     | Bacteroidetes  | 0.28 | 21.2 | 246  | 3    | 29   | 2         | 2           | Obligate    |
| NC014004.1        | <i>Sulcia muelleri</i> _DMI N                                     | Bacteroidetes  | 0.24 | 22.5 | 226  | 3    | 31   | 1         | 0           | Obligate    |
| NC010118          | <i>Sulcia muelleri</i> _GW SS                                     | Bacteroidetes  | 0.25 | 22.4 | 227  | 3    | 31   | 2         | 0           | Obligate    |
| NC013062          | Flavobacteriaceae_bacterium_3519-10                               | Bacteroidetes  | 2.77 | 42.7 | 2481 | 6    | 42   | 3         | 30          | Free living |
| CP000685.1        | <i>Flavobacterium johnsoniae</i> _UW101                           | Bacteroidetes  | 6.10 | 34.1 | 5113 | 18   | 60   | 3         | 53          | Free living |
| CP016907.1        | <i>Flavobacterium johnsoniae</i> _GSE09                           | Bacteroidetes  | 5.11 | 34.3 | 4239 | 15   | 66   | 3         | 56          | Free living |
| CP003263.1        | <i>Uzinura diaspidicola</i> _ASNER                                | Bacteroidetes  | 0.26 | 30.2 | 227  | 3    | 30   | 2         | 1           | Obligate    |
| NZCP006873.1      | <i>Walczuchella monopylebidarum</i>                               | Bacteroidetes  | 0.31 | 32.6 | 271  | 3    | 33   | 2         | 16          | Obligate    |
| NC004545.1        | <i>Buchnera aphidicola</i> _str_Bpistaciae                        | Proteobacteria | 0.64 | 26.3 | 576  | 3    | 31   | 3         | 9           | Obligate    |
| NC011833.1        | <i>Buchnera aphidicola</i> _str_Apisum_5A                         | Proteobacteria | 0.62 | 25.3 | 517  | 3    | 31   | 3         | 3           | Obligate    |
| CP001277.1        | <i>Hamiltonella defensa</i> _5AT                                  | Proteobacteria | 2.17 | 40.4 | 1915 | 9    | 42   | 4         | 210         | Facultative |
| CP002295.1        | <i>Serratia symbiotica</i> _str_Cinara_cedri                      | Proteobacteria | 1.76 | 29.2 | 672  | 3    | 36   | 3         | 59          | Facultative |
| NZACYF0000000.1   | <i>Regiella insecticola</i> _LSR1                                 | Proteobacteria | 2.07 | 42.4 | 1658 | 12   | 41   | 4         | 469         | Facultative |
| <i>This study</i> | Endosymbiont of <i>Geopemphigus</i> sp. S2 "Ca. Skilesia alterna" | Bacteroidetes  | 1.32 | 37.0 | 1611 | 3    | 35   | 0         | -           | Obligate    |

**Figure S1.** Maximum likelihood phylogenies based on amino acid alignments for aphid-host genes including laterally transferred genes, (A) *amiD*, (B) *bLys*, and (C) *rlpA*, and novel aphid-specific genes, (D) *SP*.

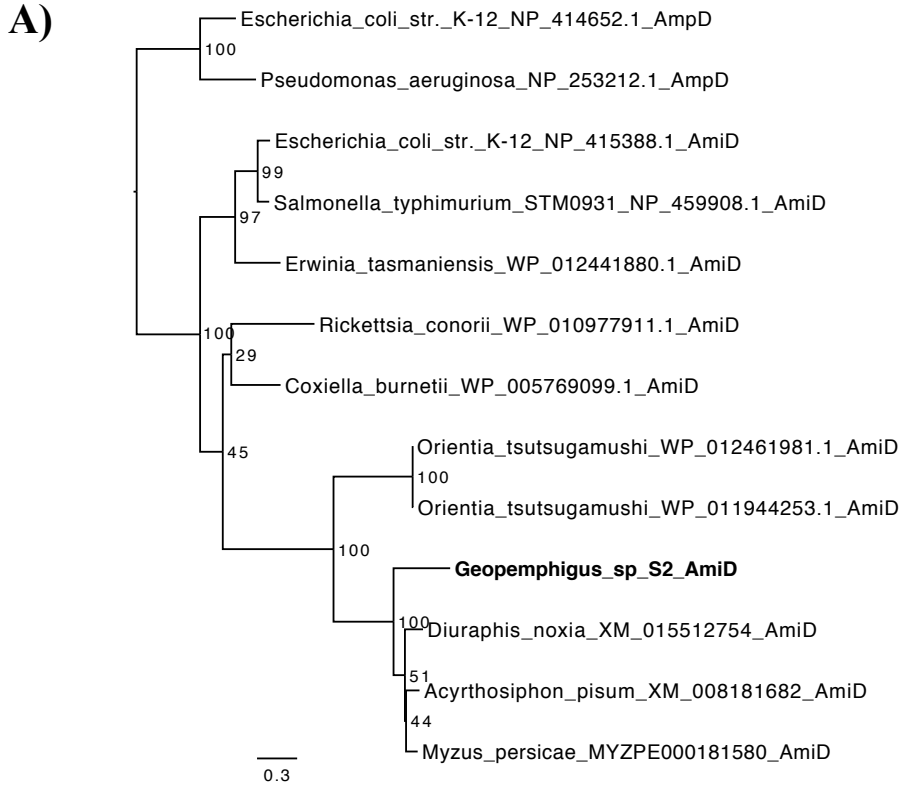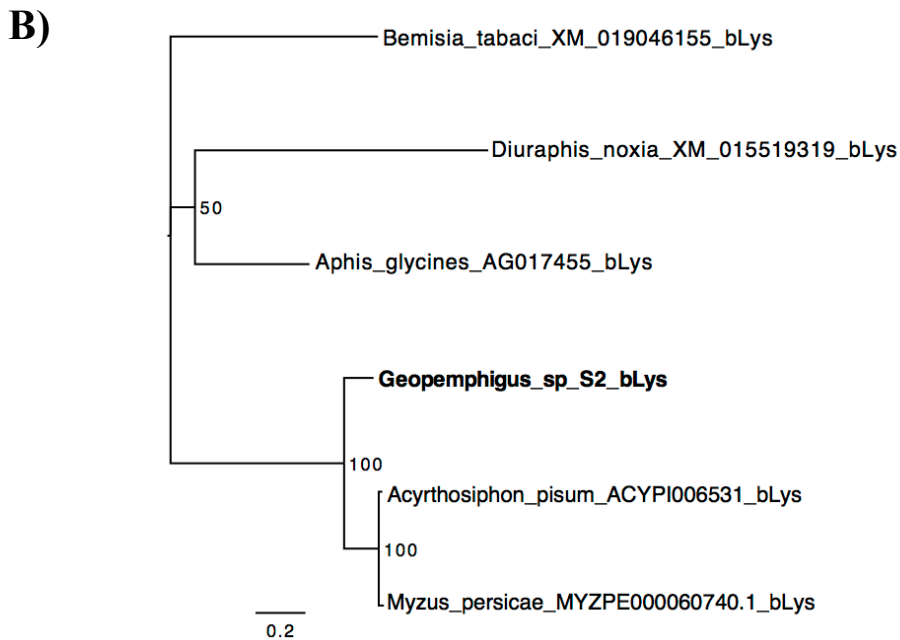

C)

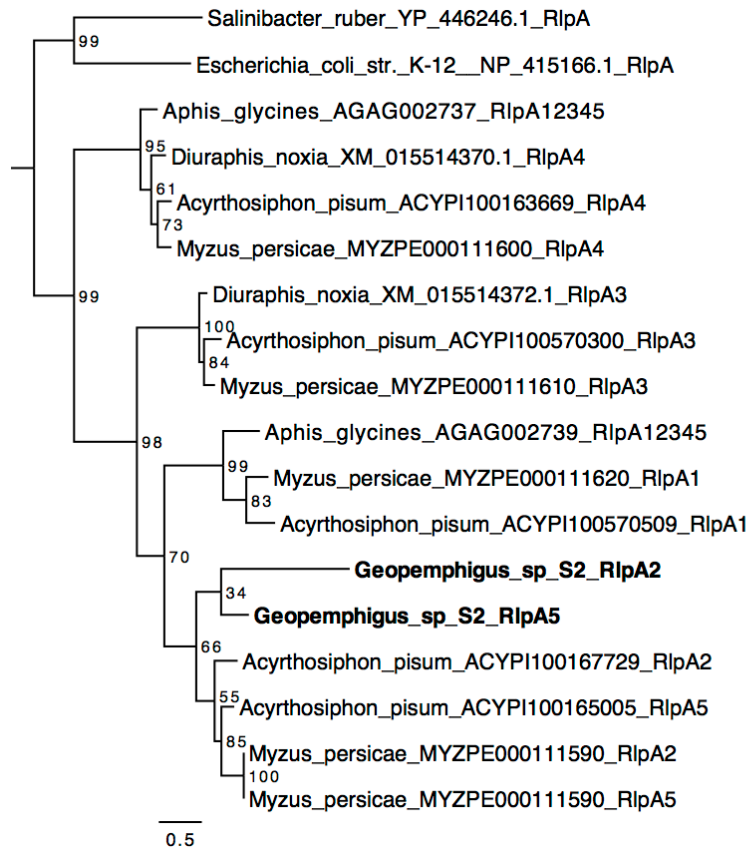

D)

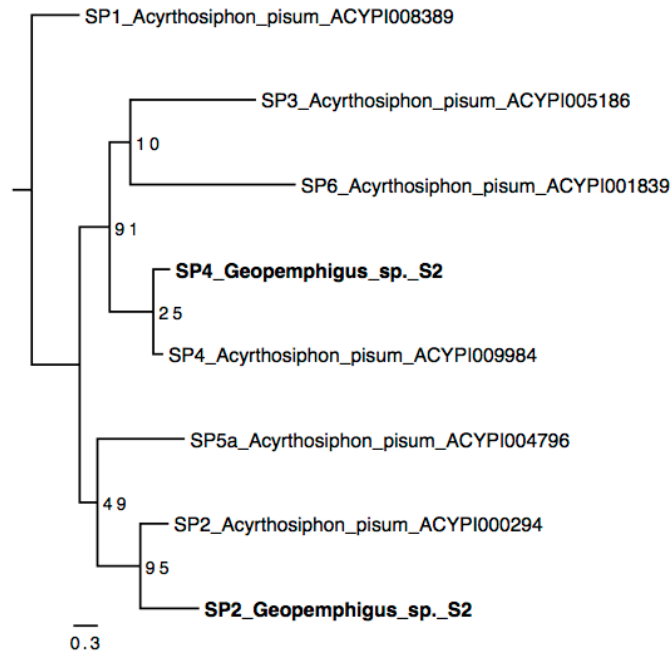

Supplement: 41396_2017_24_MOESM1_ESM.pdf [file 41396_2017_24_MOESM1_ESM.pdf]
